# Supplementary material for: A molecularly imprinted nanocavity with transformable domains that fluorescently indicate the presence of antibiotics in meat extract samples
Source: Royal Society of Chemistry journal article supplement (doi:10.1039/d2tb00145d), 2022-01-01
Supplement: d2tb00145d1.pdf [file d2tb00145d1.pdf]

Supplementary Information for

## **Molecularly Imprinted Nanocavity with Transformable Domains That Fluorescently Indicate the Presence of Antibiotics in Meat Extract Samples**

*Azusa Oshita,<sup>1</sup> Hirobumi Sunayama,<sup>1\*</sup> Toshifumi Takeuchi<sup>1,2\*</sup>*

<sup>1</sup> Graduate School of engineering, Kobe University, 1-1, Rokkodai-cho, Nada-ku, Kobe 657-8501, Japan

<sup>2</sup> Center for Advanced Medical Engineering Research & Development (CAMED), Kobe University, 1-5-1 Minatojimaminami-machi, Chuo-ku, Kobe 650-0047, Japan

\* Corresponding author:

Hirobumi Sunayama: sunayama@penguin.kobe-u.ac.jp; Phone: +81 78 803 6594; fax: +81 78 803 6158

Toshifumi Takeuchi: takeuchi@gold.kobe-u.ac.jp; Phone: +81 78 803 6158; fax: +81 78 803 6158

## 1. Fluorescent measurement of HOLO polymers

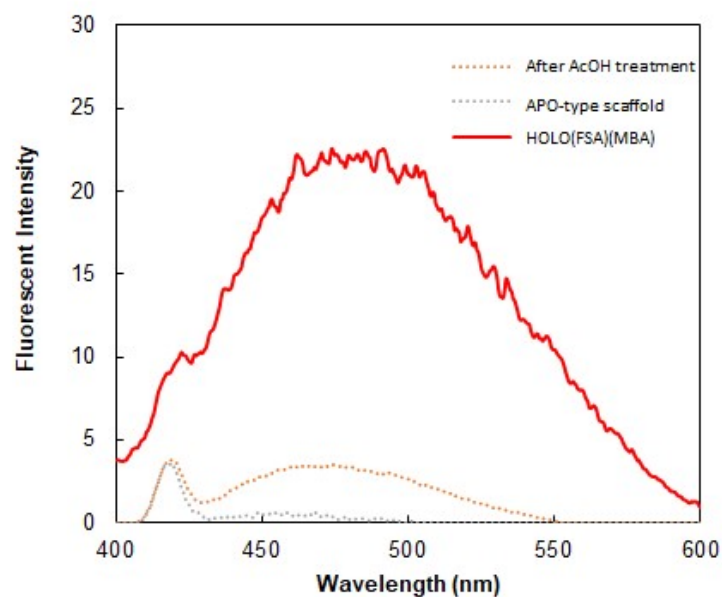

**Figure S1.** Fluorescent spectra of each polymers dispersed in aqueous media (pH 7.2) with excitation wavelength of 365 nm.

## 2. Fluorescent intensity of HOLO(FSA)(MBA)

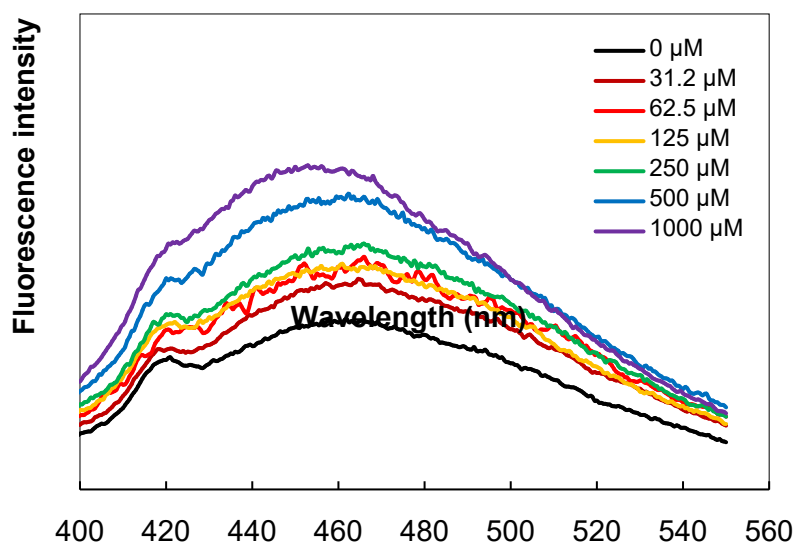

**Figure S2.** Fluorescent spectra of HOLO(FSA)(MBA) with addition of cephalexin ( $\lambda_{\text{ex}}=365$  nm).

### 3. Fluorescent intensity of HOLO(FSA)(MBA)

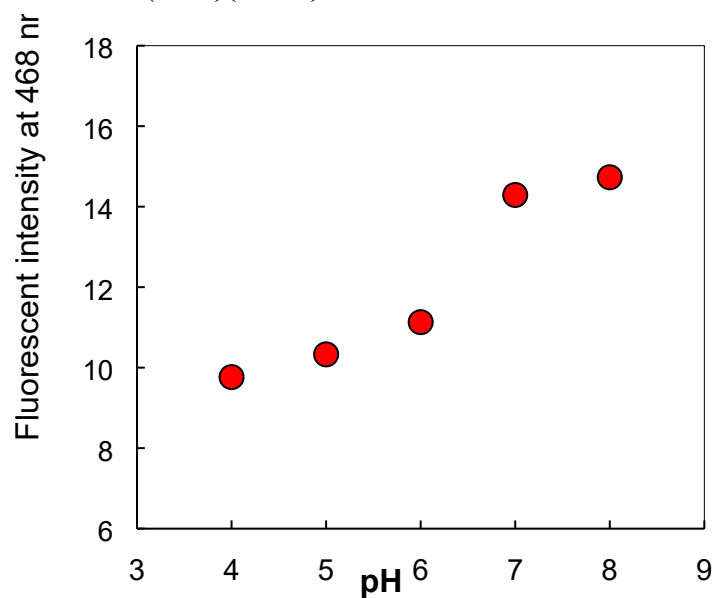

**Figure S3.** Initial fluorescent intensity of HOLO(FSA)(MBA) in aqueous media with different pH values (pH 4-8).

### 4. Calibration curve, linearity range, and limit of detection of the developed sensor

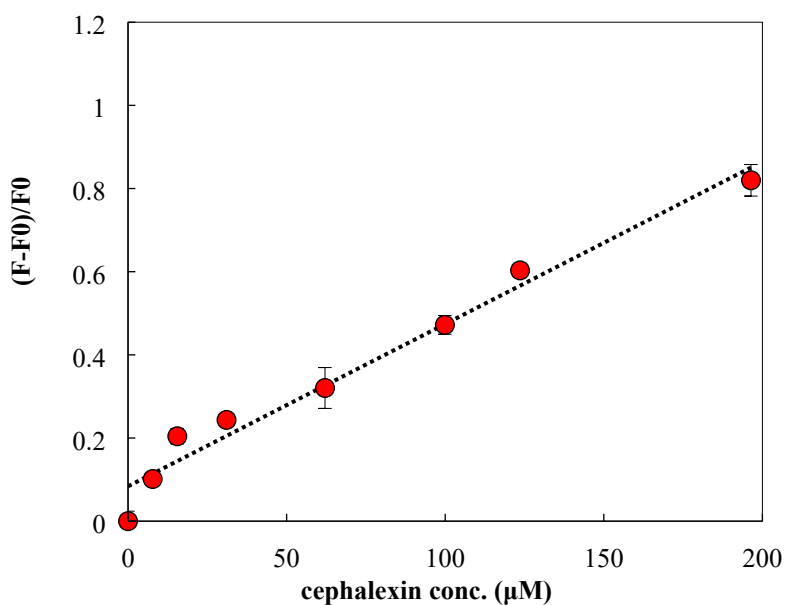

**Figure S4.** Relative fluorescent changes of HOLO polymer toward cephalixin (0 – 196  $\mu\text{M}$ ) in chicken extract samples through pre-treatment. The error bars were obtained from triplicate experiments.

## 5. Recovery test

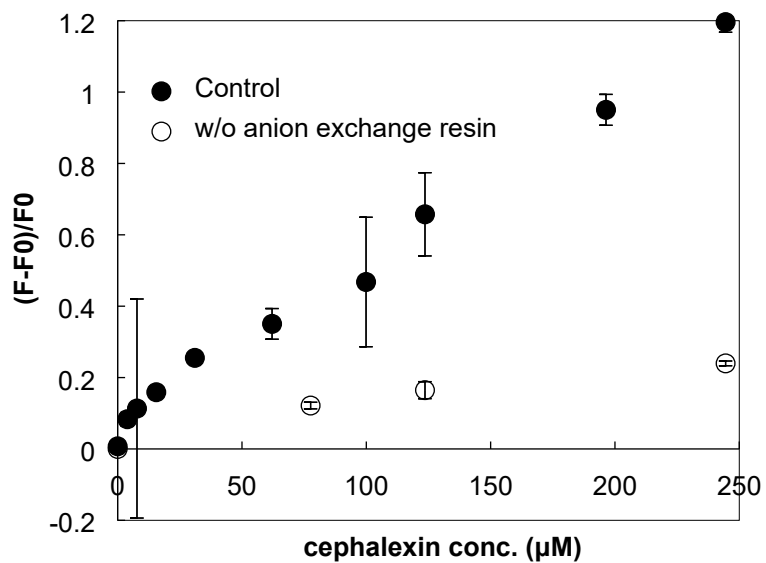

**Figure S5.** Relative fluorescent changes of HOLO polymer toward cephalixin in chicken extract samples through pre-treatment with anion exchange resin (closed circle) and without that (open circle).
